# Supplementary material for: Thermoplastic silicone elastomers from divanillin crosslinkers in a catalyst-free process
Source: Royal Society of Chemistry journal article supplement (doi:10.1039/d1gc01696b), 2021-01-01
Supplement: d1gc01696b1.pdf [file d1gc01696b1.pdf]

## Divanillin Crosslinkers Give Dynamic Silicone Elastomers in a Catalyst-Free Process

Robert Bui<sup>a</sup> and Michael A. Brook<sup>\*a</sup>

### Supporting Information

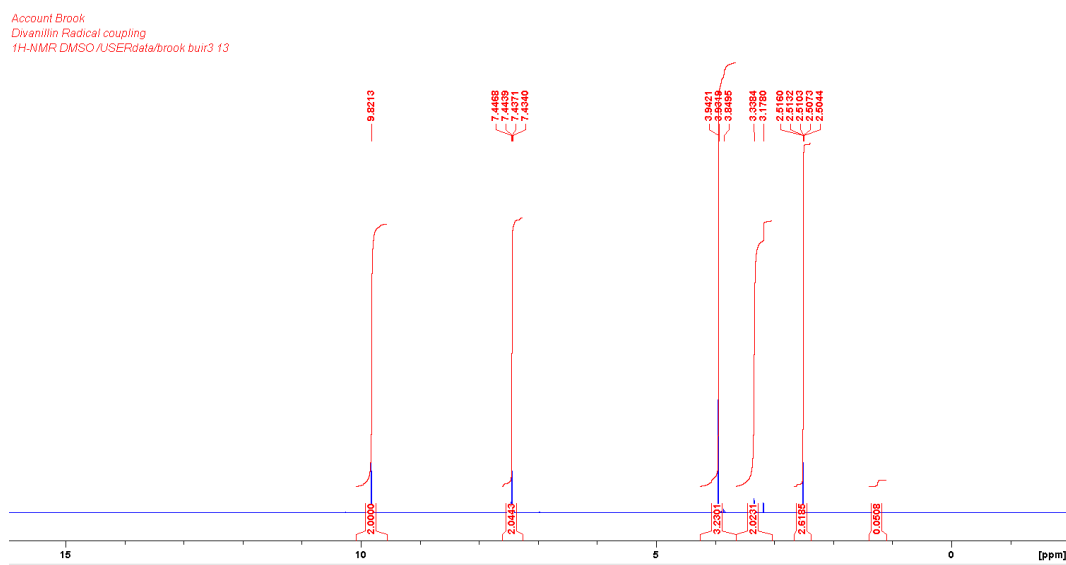

Figure S1. NMR spectrum of the DiVan crosslinker dissolved in DMSO-*d*<sub>6</sub>.

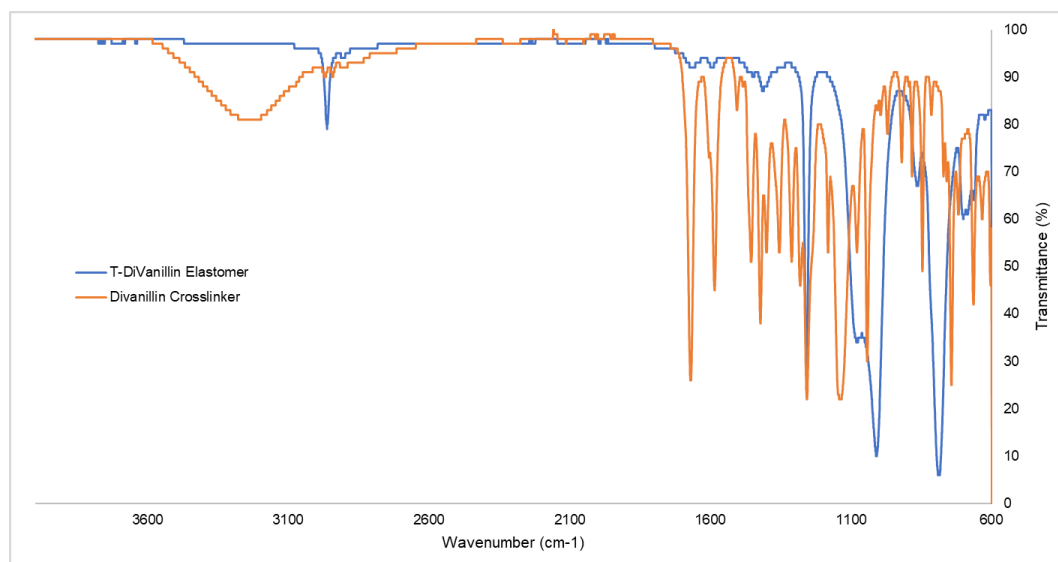

Figure S2. Infrared spectra from the reaction between divanillin and  $\alpha,\omega$ -(3-aminopropyl)polydimethylsiloxanes, showing the conversion of aldehydes to imines.

### Preparation of Terephthaldehyde Crosslinked Elastomers and DiPhen-P Controls

Terephthaldehyde and 4,4'-diphenyldialdehyde crosslinked elastomers with various functional group concentrations were fabricated as a comparison of viscoelastic properties with divanillin crosslinked elastomers. Elastomers were only formed using (3-aminopropyl)methylsiloxane-dimethylsiloxane copolymers, while  $\alpha,\omega$ -(3-aminopropyl)-polydimethylsiloxanes resulting in viscous fluids instead of elastomers.

In a typical preparation, terephthaldehyde (41.77 mg, 0.311 mmol) was first dissolved in chloroform (1 mL); there were no significant differences in the outcomes as a function of solvent), then added to a vial containing AMS-152 (5% mol aminopropylmethylsiloxane, 8500 g mol<sup>-1</sup>, 0.923 g, 0.115 mmol), and rapidly stirred until homogenous. The mixture was then poured into the desired mold, or cast as a thin film. Similarly, 4,4'-diphenyldialdehyde (67.27 mg, 0.320 mmol) was dissolved in chloroform (0.8 mL), then added to a vial containing AMS-152 (5% mol aminopropylmethylsiloxane, 8500 g mol<sup>-1</sup>, 0.923 g, 0.115 mmol), and stirred. The mixture was cast as a thin film or into the desired mold for tensile testing.

Table S1. Formulations of DiVan-T elastomers using different molecular weights of  $\alpha,\omega$ -(3-aminopropyl)polydimethylsiloxanes and DiVan-P elastomers using pendent (3-aminopropyl)methylsiloxane-dimethylsiloxane copolymers in which the mol% aminopropyl mole groups varied in a 1:1, or 1:1.1 ratio; the latter being used exclusively for determining physical properties.

| Telechelic Divanillin Elastomers (DiVan-T) | Molar mass (Da) | % Amine Functionality | [Amine] (M) | Mass of Aminosilicone (g) | [Amine] (mmol) | Mass DiVanillin | Silicone to Divanillin Mass Ratio |
|--------------------------------------------|-----------------|-----------------------|-------------|---------------------------|----------------|-----------------|-----------------------------------|
| T-19                                       | 0.9k            | Telechelic            | 2.17        | 5.102                     | 11.3           | 1.714           | 25.1%                             |
| T-5                                        | 3k              | Telechelic            | 0.653       | 5.052                     | 3.36           | 0.509           | 9.2%                              |
| T-3                                        | 5k              | Telechelic            | 0.392       | 5.082                     | 2.03           | 0.307           | 5.7%                              |
| T-0.6                                      | 25k             | Telechelic            | 0.0784      | 5.009                     | 0.401          | 0.061           | 1.2%                              |
| T-0.3                                      | 50k             | Telechelic            | 0.0392      | 5.074                     | 0.203          | 0.031           | 0.6%                              |
| Pendent Divanillin Elastomers (DiVan-P)    |                 |                       |             |                           |                |                 |                                   |
| P-3                                        | 5.5k            | 3                     | 0.387       | 5.066                     | 2.01           | 0.302           | 5.6%                              |
| P-5                                        | 8k              | 5                     | 0.675       | 5.017                     | 3.45           | 0.522           | 9.4%                              |
| P-7                                        | 4k              | 7                     | 0.946       | 5.101                     | 4.92           | 0.744           | 12.7%                             |
| P-11                                       | 2.5k            | 11                    | 1.35        | 5.038                     | 6.94           | 1.049           | 17.2%                             |

Table S2. Physical properties of DiPhen-P elastomers made using 4,4'-diphenyldialdehyde and pendent (3-aminopropyl)methylsiloxane-dimethylsiloxane copolymers in which the mol% aminopropyl differ

| DiPhen-P Starting Material <sup>a</sup> | Molar mass (kDa) | YM <sup>b</sup> (MPa) | Shore A <sup>c</sup> | Tensile Stress (Mpa) | Tensile Strain at Break (%) |
|-----------------------------------------|------------------|-----------------------|----------------------|----------------------|-----------------------------|
| P-B                                     |                  |                       |                      |                      |                             |
| P-3                                     | 5.5k             | 0.36                  | 30 (OO)              | 0.764                | 165                         |
| P-5                                     | 8k               | 0.881                 | 55 (OO)              | 1.11                 | 132                         |
| P-7                                     | 4k               | 2.1                   | 13                   | 2.54                 | 118                         |
| P-11                                    | 2.5k             | 4.47                  | 20                   | 3.93                 | 112                         |

<sup>a</sup> The number refers to the % amine-containing monomers in the starting aminosilicone polymer. <sup>b</sup> YM Young's modulus. <sup>c</sup> Where indicated, Shore OO Hardness measurements were made on softer samples.

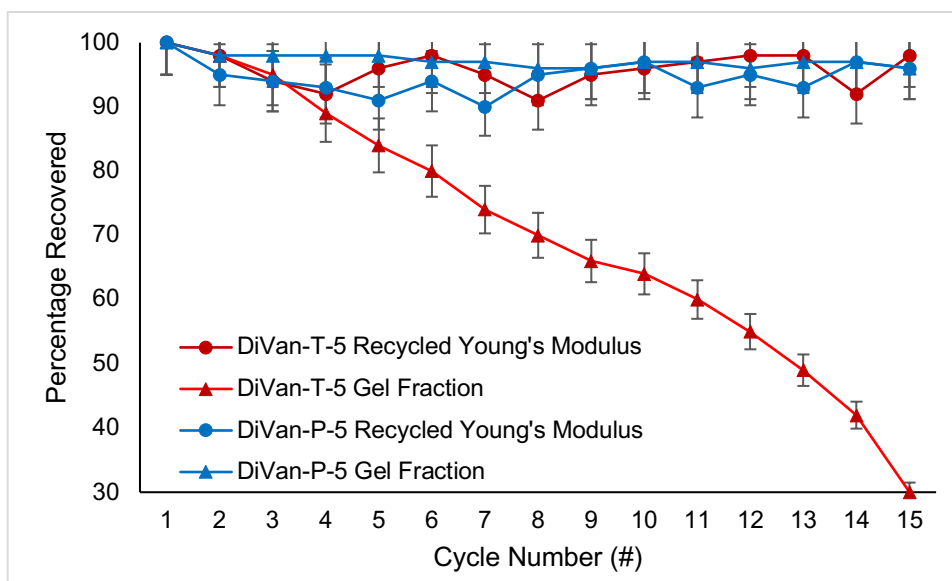

Figure S3: Swelling and Young's Modulus of DiVan-T-5 and DiVan-P-5 after multiple cycles of swelling crumbled elastomer and heat pressing to obtain new monolithic samples.

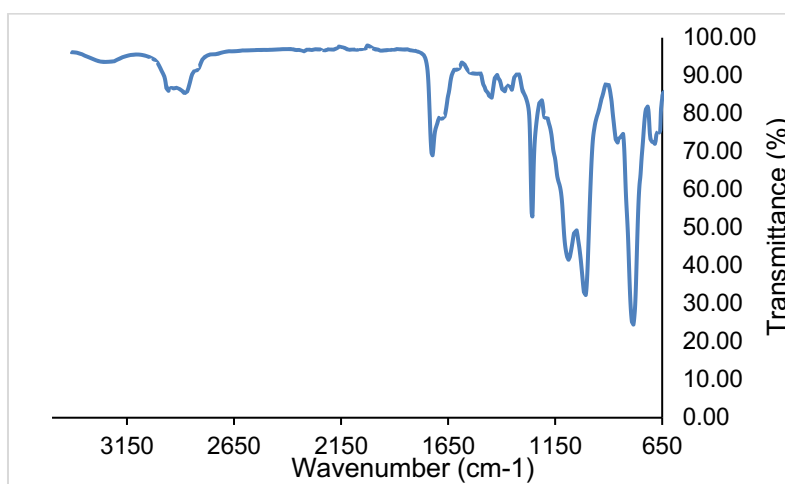

Figure S4: Infrared spectrum of the products from degrading DiVan-P elastomers with excess phenylhydrazine for 48 h.

Table S3. Formulations of elastomers **DiVan-P-B-3CL** with the same crosslink density made from pendent (3-aminopropyl)methylsiloxane-dimethylsiloxane copolymers in which the mol% aminopropyl differ, but with the same amount of divanillin (leading to different excesses)

| Pendent Divanillin Elastomers for Self-Healing | Molar Mass (kDa) | % Amine Functionality | [Amine] (M) | Mass of Amino-silicone | mmols Amine | Amine to Aldehyde Ratio | Mass DiVanillin | mmol DiVanillin | Amine Excess (mmol) | [Amine] Excess (M) |
|------------------------------------------------|------------------|-----------------------|-------------|------------------------|-------------|-------------------------|-----------------|-----------------|---------------------|--------------------|
| <b>P-3-3CL</b>                                 | 5.5k             | 3                     | 0.387       | 5.062                  | 1.92        | 1:1                     | 0.291           | 0.959           | 0.00                | 0.00               |
| <b>P-5-3CL</b>                                 | 8k               | 5                     | 0.675       | 5.088                  | 3.37        | 5:3                     | 0.293           | 0.966           | 1.43                | 0.287              |
| <b>P-7-3CL</b>                                 | 4k               | 7                     | 0.946       | 5.011                  | 4.65        | 7:3                     | 0.297           | 0.979           | 2.69                | 0.537              |
| <b>P-11-3CL</b>                                | 2.5k             | 11                    | 1.35        | 4.992                  | 6.60        | 11:3                    | 0.290           | 0.956           | 4.70                | 0.938              |

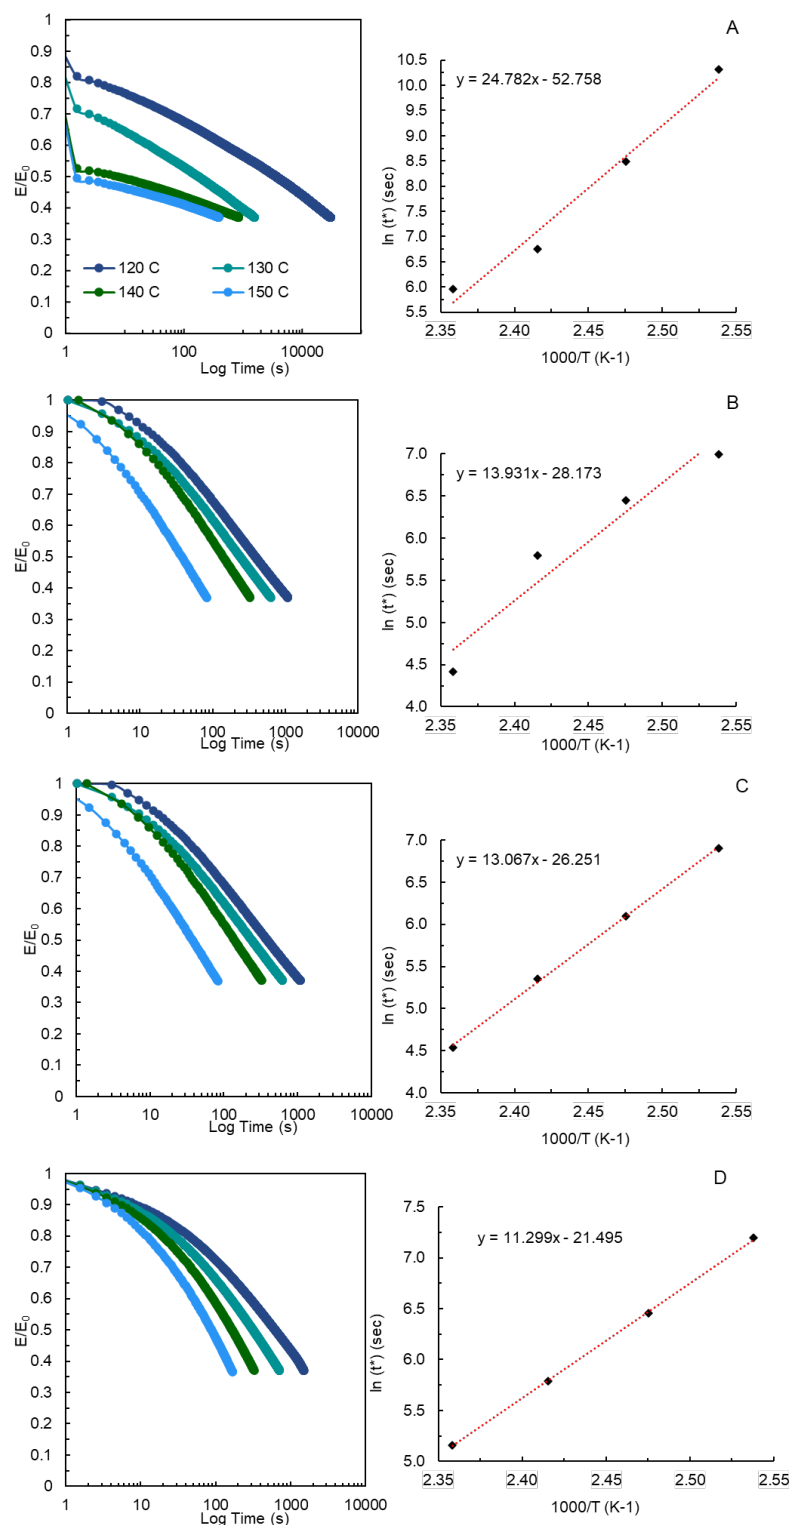

Figure S5. Arrhenius thermal stress-relaxation of A) DiVan-T-19, B) DiVan-T-5, C) DiVan-T-3 and D) DiVan-T-0.6 elastomers under constant strain (10%) from 120-150 °C and at 25 °C as a control. Showing the relaxation of the material from initial stress, to  $E/E_0 = 1/e$  ( $\sim 0.37$ ), and Arrhenius plot modeling the Maxwell viscoelastic relaxation.

Table S4. Calculated material relaxation activation energies of **DiVan-T** elastomers using different molecular weights of telechelic 3-(aminopropyl)-terminated polydimethylsiloxanes determined using DMTA

| Sample Name        | [Amine] (M) | Slope  | Averaged Calculated Activation Energy of Relaxation (kJ mol <sup>-1</sup> ) |
|--------------------|-------------|--------|-----------------------------------------------------------------------------|
| <b>DiVan-T-19</b>  | 900         | 24.782 | 206.03                                                                      |
| <b>DiVan-T-5</b>   | 3000        | 13.931 | 115.82                                                                      |
| <b>DiVan-T-0.6</b> | 5000        | 13.067 | 108.64                                                                      |
| <b>DiVan-T-0.3</b> | 25000       | 11.299 | 93.94                                                                       |

Equation S1. Arrhenius model of elastomer relaxation where  $t_r$  is the relaxation time,  $E_a$  is activation energy,  $R$  is the Boltzmann's constant, and  $T$  is temperature

$$t_R = A e^{\frac{-E_a}{RT}}$$

$$\ln(t_R) = \ln(A) + \frac{-E_a}{RT} \quad (1)$$
